# Supplementary material for: Rational design of organoboron heteroarene derivatives as luminescent and charge transport materials for organic light-emitting diodes
Source: Royal Society of Chemistry journal article supplement (doi:10.1039/c5nj01499a), 2015-01-01
Supplement: c5nj01499a1.pdf [file c5nj01499a1.pdf]

*New Journal of Chemistry*

## **Rational design of organoboron heteroarene derivatives as luminescent and charge transport materials for organic light-emitting diodes**

Ruifa Jin\* and Wenmin Xiao

*Inner Mongolia Key Laboratory of Photoelectric Functional Materials and College of Chemistry and Chemical Engineering, Chifeng University, Chifeng 024000, China*

### **Index**

**Table S1** The calculated total energies of the compounds under investigation in different space groups.

**Table S2** The calculated crystal cell parameters of the compounds under investigation with the lowest total energies.

**Table S3** Center–center distance and the corresponding hole and electron coupling between the dimer in all of the nearest neighbor pathways for **1d** and **2d** in different space groups.

**Table S4** Center–center distance and the corresponding hole and electron coupling between the dimer in all of the nearest neighbor pathways for the crystal structures of **1a–1c** and **2a–2c** with the lowest total energies.

**Table S1** The calculated total energies of the compounds under investigation in different space groups.

| Space groups                                    | 1a          | 1b          | 1c          | 1d          | 2a          | 2b          | 2c          | 2d          |
|-------------------------------------------------|-------------|-------------|-------------|-------------|-------------|-------------|-------------|-------------|
| <i>C2</i>                                       | 95.66051472 | 116.9983839 | 128.8217775 | 138.2400842 | 101.8331040 | 133.9608482 | 149.3996535 | 103.2337225 |
|                                                 |             | 3           | 2           | 5           | 7           | 6           | 7           | 9           |
| <i>C2/c</i>                                     | 103.7561810 | 120.5923107 | 132.5515364 | 138.9258335 | 95.46939511 | 135.3544498 | 147.6496528 | 109.4781795 |
|                                                 | 3           | 0           | 9           | 2           |             | 9           | 1           | 6           |
| <i>Cc</i>                                       | 96.15214464 | 118.0373413 | 132.0090549 | 131.8166024 | 94.08141538 | 134.2814809 | 148.1600322 | 104.5028136 |
|                                                 |             | 4           | 0           | 0           |             | 1           | 1           | 0           |
| <i>P2<sub>1</sub></i>                           | 98.08297935 | 116.9255814 | 124.4582684 | 135.8100776 | 96.16346672 | 129.3756082 | 148.4334685 | 100.8740793 |
|                                                 |             | 8           | 6           | 3           |             | 7           | 2           | 1           |
| <i>P2<sub>1</sub>/c</i>                         | 99.11753329 | 124.5224884 | 129.2447034 | 140.0392959 | 102.6304258 | 134.4401830 | 151.1377558 | 103.4832714 |
|                                                 |             | 4           | 0           | 0           | 0           | 6           | 9           | 3           |
| <i>P2<sub>1</sub>2<sub>1</sub>2<sub>1</sub></i> | 97.30101171 | 119.3371527 | 130.0478584 | 130.6612599 | 95.29268896 | 133.0813255 | 149.1507421 | 103.4205879 |
|                                                 |             | 9           | 6           | 2           |             | 0           | 5           | 8           |
| <i>P<math>\bar{1}</math></i>                    | 92.70361903 | 119.2886535 | 129.1663201 | 138.9254990 | 95.78282161 | 134.6923374 | 147.3417531 | 109.6988072 |
|                                                 |             | 5           | 8           | 5           |             | 3           | 4           | 6           |
| <i>Pbca</i>                                     | 100.5684337 | 122.9088167 | 133.5082367 | 139.1814249 | 105.8022419 | 132.6362013 | 147.1060899 | 95.46072459 |
|                                                 | 9           | 4           | 4           | 4           | 0           | 1           | 1           |             |
| <i>Pbcn</i>                                     | 102.8838496 | 124.3606208 | 128.5318619 | 147.7618202 | 97.50136797 | 138.4997464 | 148.1978459 | 109.3856478 |
|                                                 | 1           | 7           | 9           | 3           |             | 3           | 3           | 2           |
| <i>Pna2<sub>1</sub></i>                         | 96.05303336 | 121.8149678 | 130.5619881 | 136.8646066 | 95.96388915 | 136.5622693 | 144.0890066 | 97.96619460 |
|                                                 |             | 8           | 0           | 4           |             | 1           | 0           |             |

**Table S2** The calculated crystal cell parameters of the compounds under investigation with the lowest total energies.

| Species   | space groups                                    | a      | b      | c      | $\square\alpha$ | $\square\beta$ | $\square\gamma$ |
|-----------|-------------------------------------------------|--------|--------|--------|-----------------|----------------|-----------------|
| <b>1a</b> | <i>P<math>\bar{1}</math></i>                    | 9.954  | 11.483 | 10.665 | 99.5            | 104.6          | 117.8           |
| <b>1b</b> | <i>P2<sub>1</sub></i>                           | 10.213 | 13.321 | 9.304  | 90.0            | 103.8          | 90.0            |
| <b>1c</b> | <i>P2<sub>1</sub></i>                           | 8.922  | 9.610  | 14.601 | 90.0            | 112.2          | 90.0            |
| <b>1d</b> | <i>P2<sub>1</sub>2<sub>1</sub>2<sub>1</sub></i> | 12.074 | 13.900 | 15.048 | 90.0            | 90.0           | 90.0            |
| <b>2a</b> | <i>Cc</i>                                       | 22.027 | 9.721  | 9.428  | 90.0            | 96.6           | 90.0            |
| <b>2b</b> | <i>Pbca</i>                                     | 29.388 | 15.488 | 11.710 | 90.0            | 90.0           | 90.0            |
| <b>2c</b> | <i>Pna2<sub>1</sub></i>                         | 24.278 | 9.273  | 10.011 | 90.0            | 90.0           | 90.0            |
| <b>2d</b> | <i>Pbca</i>                                     | 17.153 | 16.703 | 17.298 | 90.0            | 90.0           | 90.0            |

**Table S3** Center–center distance and the corresponding hole and electron coupling between the dimer in all of the nearest neighbor pathways for **1d** and **2d** in different space groups.

| Species        | Space groups | Pathway | Distance (Å) | Electron coupling (eV) | Hole coupling (eV)    |
|----------------|--------------|---------|--------------|------------------------|-----------------------|
| <b>1d</b>      | <i>Cc</i>    | 1       | 8.367        | $1.50\times 10^{-3}$   | $1.47\times 10^{-4}$  |
|                |              | 2       | 8.367        | $1.50\times 10^{-3}$   | $1.47\times 10^{-4}$  |
|                |              | 3       | 10.99        | $-1.45\times 10^{-14}$ | $5.27\times 10^{-17}$ |
|                |              | 4       | 10.99        | $-1.45\times 10^{-14}$ | $5.27\times 10^{-17}$ |
|                |              | 5       | 8.523        | $1.28\times 10^{-4}$   | $8.63\times 10^{-6}$  |
|                |              | 6       | 8.523        | $1.28\times 10^{-4}$   | $8.63\times 10^{-6}$  |
|                |              | 7       | 15.544       | $2.34\times 10^{-24}$  | $3.47\times 10^{-25}$ |
|                |              | 8       | 9.611        | $9.54\times 10^{-4}$   | $1.18\times 10^{-5}$  |
|                |              | 9       | 13.590       | $1.40\times 10^{-10}$  | $7.40\times 10^{-11}$ |
| Drift mobility |              |         |              | $5.02\times 10^{-4}$   | $5.36\times 10^{-6}$  |

|                |                         |   |        |                        |                        |
|----------------|-------------------------|---|--------|------------------------|------------------------|
| <b>2d</b>      | <i>Pna2<sub>1</sub></i> | 1 | 10.338 | $4.04 \times 10^{-4}$  | $1.48 \times 10^{-4}$  |
|                |                         | 2 | 10.338 | $4.04 \times 10^{-4}$  | $1.48 \times 10^{-4}$  |
|                |                         | 3 | 7.135  | $-5.12 \times 10^{-4}$ | $2.2 \times 10^{-4}$   |
|                |                         | 4 | 11.287 | $-5.8 \times 10^{-3}$  | $-1.71 \times 10^{-4}$ |
|                |                         | 5 | 7.135  | $-5.12 \times 10^{-4}$ | $2.2 \times 10^{-4}$   |
|                |                         | 6 | 11.287 | $-8.73 \times 10^{-4}$ | $3.42 \times 10^{-4}$  |
|                |                         | 7 | 14.008 | $2.85 \times 10^{-4}$  | $-4.65 \times 10^{-5}$ |
|                |                         | 8 | 14.008 | $2.85 \times 10^{-4}$  | $-4.65 \times 10^{-5}$ |
| Drift mobility |                         |   |        | $1.56 \times 10^{-2}$  | $2.66 \times 10^{-5}$  |

**Table S4** Center–center distance and the corresponding hole and electron coupling between the dimer in all of the nearest neighbor pathways for the crystal structures of **1a–1c** and **2a–2c** with the lowest total energies.

| Species   | Space groups                 | Pathway | Distance (Å) | Electron coupling (eV)        | Hole coupling (eV)           |
|-----------|------------------------------|---------|--------------|-------------------------------|------------------------------|
| <b>1a</b> | <i>P<math>\bar{1}</math></i> | 1       | 9.954        | $2.93 \times 10^{-5}$         | $1.90 \times 10^{-5}$        |
|           |                              | 2       | 9.954        | $1.53 \times 10^{-4}$         | $-6.58 \times 10^{-5}$       |
|           |                              | 3       | 11.142       | $-4.89 \times 10^{-6}$        | $5.52 \times 10^{-6}$        |
|           |                              | 4       | 11.142       | $-4.88 \times 10^{-6}$        | $5.56 \times 10^{-6}$        |
|           |                              | 5       | 5.691        | $-6.10 \times 10^{-3}$        | $-1.11 \times 10^{-2}$       |
|           |                              | 6       | 13.229       | $1.68 \times 10^{-6}$         | $-5.38 \times 10^{-7}$       |
|           |                              | 7       | 8.651        | $1.07 \times 10^{-2}$         | $-1.97 \times 10^{-2}$       |
|           |                              | 8       | 16.128       | $2.43 \times 10^{-4}$         | $1.97 \times 10^{-5}$        |
| <b>1b</b> | <i>P2<sub>1</sub></i>        | 1       | 10.213       | $5.60 \times 10^{-3}$         | $1.40 \times 10^{-3}$        |
|           |                              | 2       | 10.213       | $5.60 \times 10^{-3}$         | $1.40 \times 10^{-3}$        |
|           |                              | 3       | 9.304        | $-8.91 \times 10^{-6}$        | $5.20 \times 10^{-6}$        |
|           |                              | 4       | 9.304        | $-8.91 \times 10^{-6}$        | $5.20 \times 10^{-6}$        |
|           |                              | 5       | 10.120       | $1.61 \times 10^{-4}$         | $1.67 \times 10^{-4}$        |
|           |                              | 6       | 6.872        | $4.10 \times 10^{-3}$         | $-1.50 \times 10^{-3}$       |
|           |                              | 7       | 10.120       | $1.61 \times 10^{-4}$         | $1.67 \times 10^{-4}$        |
| <b>1c</b> | <i>P2<sub>1</sub></i>        | 1       | 8.922        | $-1.90 \times 10^{-3}$        | $-2.29 \times 10^{-2}$       |
|           |                              | 2       | 8.922        | $-1.90 \times 10^{-3}$        | $-2.29 \times 10^{-2}$       |
|           |                              | 3       | 9.610        | $1.08 \times 10^{-4}$         | $-1.81 \times 10^{-5}$       |
|           |                              | 4       | 9.610        | $1.08 \times 10^{-4}$         | $-1.81 \times 10^{-5}$       |
|           |                              | 5       | 9.104        | $-8.2683e-007 \times 10^{-5}$ | $3.0995e-007 \times 10^{-5}$ |
|           |                              | 6       | 9.104        | $-8.27 \times 10^{-7}$        | $3.10 \times 10^{-7}$        |
|           |                              | 7       | 8.534        | $-1.10 \times 10^{-5}$        | $7.94 \times 10^{-6}$        |
|           |                              | 8       | 8.534        | $-1.10 \times 10^{-5}$        | $7.93 \times 10^{-6}$        |
| <b>2a</b> | <i>Cc</i>                    | 1       | 9.721        | $-1.10 \times 10^{-3}$        | $7.86 \times 10^{-4}$        |
|           |                              | 2       | 9.721        | $-1.10 \times 10^{-3}$        | $7.86 \times 10^{-4}$        |
|           |                              | 3       | 12.468       | $7.13 \times 10^{-5}$         | $-5.11 \times 10^{-5}$       |
|           |                              | 4       | 12.468       | $7.13 \times 10^{-5}$         | $-5.11 \times 10^{-5}$       |
|           |                              | 5       | 12.039       | $1.90 \times 10^{-4}$         | $-2.25 \times 10^{-4}$       |
|           |                              | 6       | 6.599        | $-5.20 \times 10^{-3}$        | $-1.86 \times 10^{-2}$       |
|           |                              | 7       | 6.599        | $-5.20 \times 10^{-3}$        | $-1.86 \times 10^{-2}$       |
| <b>2b</b> | <i>Pbca</i>                  | 1       | 11.710       | $1.08 \times 10^{-18}$        | $2.38 \times 10^{-18}$       |
|           |                              | 2       | 11.710       | $1.08 \times 10^{-18}$        | $2.38 \times 10^{-18}$       |
|           |                              | 3       | 13.861       | $1.21 \times 10^{-5}$         | $-1.07 \times 10^{-5}$       |
|           |                              | 4       | 5.414        | $-3.40 \times 10^{-3}$        | $-1.38 \times 10^{-2}$       |
|           |                              | 5       | 7.632        | $3.38 \times 10^{-5}$         | $-4.53 \times 10^{-5}$       |
|           |                              | 6       | 8.358        | $1.93 \times 10^{-4}$         | $-1.30 \times 10^{-3}$       |

---

|           |                         |    |        |                        |                        |
|-----------|-------------------------|----|--------|------------------------|------------------------|
|           |                         | 7  | 14.482 | $-2.26 \times 10^{-5}$ | $8.26 \times 10^{-5}$  |
|           |                         | 8  | 8.358  | $1.93 \times 10^{-4}$  | $-1.30 \times 10^{-3}$ |
|           |                         | 9  | 7.632  | $3.38 \times 10^{-5}$  | $-4.53 \times 10^{-5}$ |
|           |                         | 10 | 14.482 | $-2.26 \times 10^{-5}$ | $8.26 \times 10^{-5}$  |
| <b>2c</b> | <i>Pna2<sub>t</sub></i> | 1  | 10.011 | $3.47 \times 10^{-6}$  | $-6.19 \times 10^{-5}$ |
|           |                         | 2  | 10.011 | $3.47 \times 10^{-6}$  | $-6.19 \times 10^{-5}$ |
|           |                         | 3  | 9.273  | $-2.00 \times 10^{-3}$ | $9.70 \times 10^{-3}$  |
|           |                         | 4  | 9.273  | $-2.00 \times 10^{-3}$ | $9.70 \times 10^{-3}$  |
|           |                         | 5  | 8.639  | $-1.02 \times 10^{-2}$ | $-1.40 \times 10^{-2}$ |
|           |                         | 6  | 8.840  | $8.12 \times 10^{-8}$  | $5.40 \times 10^{-7}$  |
|           |                         | 7  | 9.549  | $-5.76 \times 10^{-4}$ | $2.77 \times 10^{-4}$  |
|           |                         | 8  | 9.549  | $1.70 \times 10^{-3}$  | $2.90 \times 10^{-3}$  |
